# Supplementary material for: γ-Glutamyl transpeptidase acylation with peptidic substrates: free energy relationships measured by an HPLC kinetic assay
Source: Royal Society of Chemistry journal article supplement (doi:10.1039/b606914b), 2006-01-01
Supplement: b606914b.pdf [file b606914b.pdf]

**Gamma-Glutamyl Transpeptidase Acylation with Peptidic Substrates:  
Free Energy Relationships Measured by an HPLC Kinetic Assay**

Mylène Morin, Caroline Rivard and Jeffrey W. Keillor\*

*Département de chimie, Université de Montréal,*

*C.P. 6128, Succ. centre-ville, Montréal, QC H3C 3J7 Canada*

[jw.keillor@umontreal.ca](mailto:jw.keillor@umontreal.ca)

Running title: GGT Acylation

Key words: enzyme kinetics, gamma-glutamyl transpeptidase, glutathione, glutathione analogues, synthesis, HPLC, dabsyl

Abbreviations used: CHES, 2-(cyclohexylamino)ethanesulfonic acid; DABS, dabsyl, 4-dimethylaminoazobenzene-4'-sulfonyl; DIEA, diisopropylethylamine; HEPES, 4-(2-hydroxyethyl)-1-piperazineethanesulfonic acid; MES, 4-morpholinoethanesulfonic acid; MOPS, 4-morpholinopropanesulfonic acid; TBTU, N,N,N',N'-tetramethyl-O-(benzotriazol-1-yl)uronium tetrafluoroborate; TCA, trichloroacetic acid; TFA, trifluoroacetic acid.

## Supporting information

### *HPLC conditions*

**Table 1S:** Chromatographic gradient profile used for separation of the reaction products for the reactions of GGT with most of the substrate analogues studied herein.

| Time (min) | Solvent A (%)<br>(25 mM KH <sub>2</sub> PO <sub>4</sub> , pH 6.8) | Solvent B (%)<br>(acetonitrile:isopropanol)<br>(80:20) |
|------------|-------------------------------------------------------------------|--------------------------------------------------------|
| 0          | 80                                                                | 20                                                     |
| 1          | 80                                                                | 20                                                     |
| 7          | 75                                                                | 25                                                     |
| 20         | 75                                                                | 25                                                     |
| 45         | 60                                                                | 40                                                     |
| 70         | 80                                                                | 20                                                     |

**Table 2S:** Chromatographic gradient profile used for separation of reaction products for the reactions of GGT with L- $\gamma$ -glutamyl-2,2,2-trifluoroethylamide or L- $\gamma$ -glutamylglycinamide

| Time (min) | Solvent A (%)<br>(25 mM KH <sub>2</sub> PO <sub>4</sub> , pH 6.8) | Solvent B (%)<br>(acetonitrile:isopropanol)<br>(80:20) | Solvent C (%)<br>(Water) |
|------------|-------------------------------------------------------------------|--------------------------------------------------------|--------------------------|
| 0          | 80                                                                | 20                                                     | 0                        |
| 1          | 80                                                                | 20                                                     | 0                        |
| 7          | 75                                                                | 25                                                     | 0                        |
| 20         | 75                                                                | 25                                                     | 0                        |
| 45         | 60                                                                | 40                                                     | 0                        |
| 50         | 65                                                                | 35                                                     | 0                        |
| 52         | 0                                                                 | 0                                                      | 100                      |
| 67         | 0                                                                 | 0                                                      | 100                      |
| 70         | 0                                                                 | 100                                                    | 0                        |
| 85         | 0                                                                 | 100                                                    | 0                        |
| 90         | 0                                                                 | 0                                                      | 100                      |
| 105        | 0                                                                 | 0                                                      | 100                      |

**Figure 1S:** Reversed-phase HPLC chromatogram recorded at 420 nm of the dabsyl chloride derivatives of the reaction of GGT with L- $\gamma$ -glutamylglycinamide. a: L- $\gamma$ -glutamyl-L- $\gamma$ -glutamylglycinamide, b: L-glutamic acid, c: L- $\gamma$ -glutamylglycylglycine, d: DABS-OH, e: L-glutamine, standard, f: L- $\gamma$ -glutamylglycinamide, g: glycylglycine, h: glycinamide.

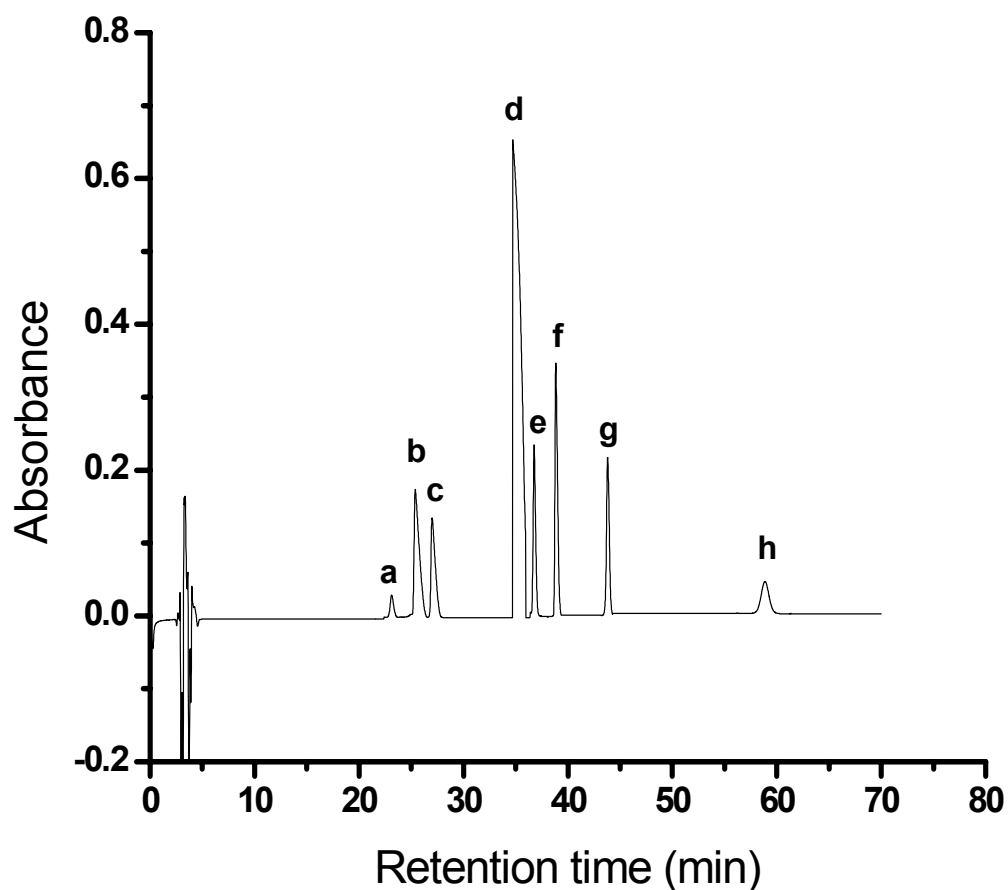

**Figure 2S:** Standard curve for the concentration of L- $\gamma$ -glutamylglycylglycine as determined by the ratio of the area of its peak compared to that of the internal standard, L-glutamine.

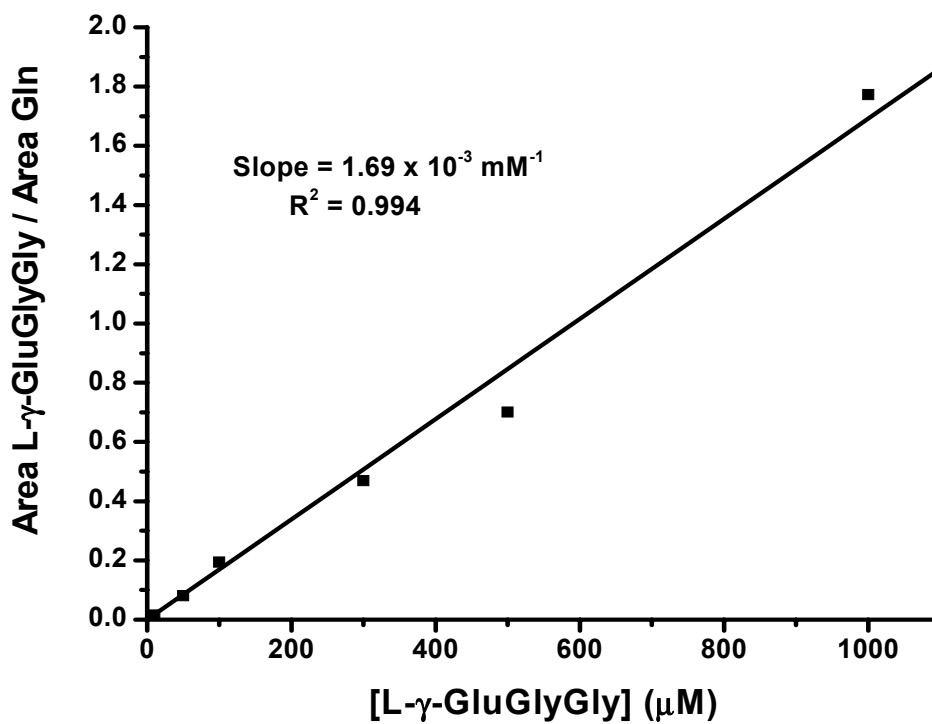

***Kinetic data***

**Table 3S:** pH-rate data for the GGT-mediated reaction of GSH with GlyGly at 37 °C.

| pH  | $k_{\text{cat}}$ ( $\text{s}^{-1}$ ) <sup>a</sup> | $K_{\text{M}}$ (mM) <sup>a</sup> |
|-----|---------------------------------------------------|----------------------------------|
| 6.0 | 120 ± 7                                           | 0.47 ± 0.09                      |
| 7.0 | 370 ± 50                                          | 0.78 ± 0.29                      |
| 8.0 | 990 ± 80                                          | 0.67 ± 0.16                      |
| 8.5 | 1092 ± 518                                        | 4.0 ± 3.0                        |
| 9.0 | 325 ± 117                                         | 2.3 ± 2.0                        |
| 9.5 | 70 ± 20                                           | 1.0 ± 0.6                        |

<sup>a</sup> Relative errors derive from the non-linear least squares fitting as described in the Experimental section.
